# Supplementary material
Source: PubMed Central journal article supplement (PMC11028569)
Supplement: 262_2013_1507_MOESM1_ESM.pdf [file 262_2013_1507_MOESM1_ESM.pdf]

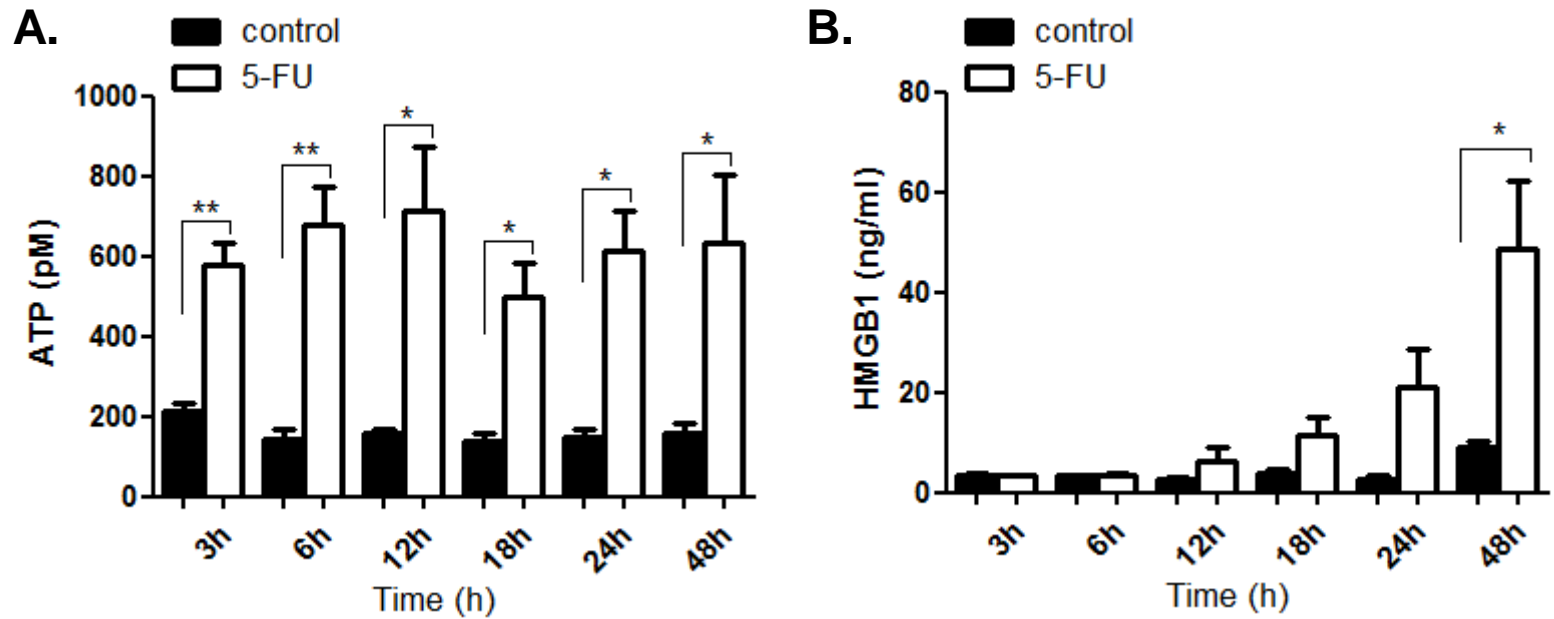

**Supplementary Figure 1:** Exposure of MB49 tumor cells to 5-FU results in the up-regulation of immunogenic cell death markers ATP (A) and HMGB1 (B) in a time-dependent manner. \* $p < 0.005$ , \*\* $p < 0.01$ , assessed by students' t-test.

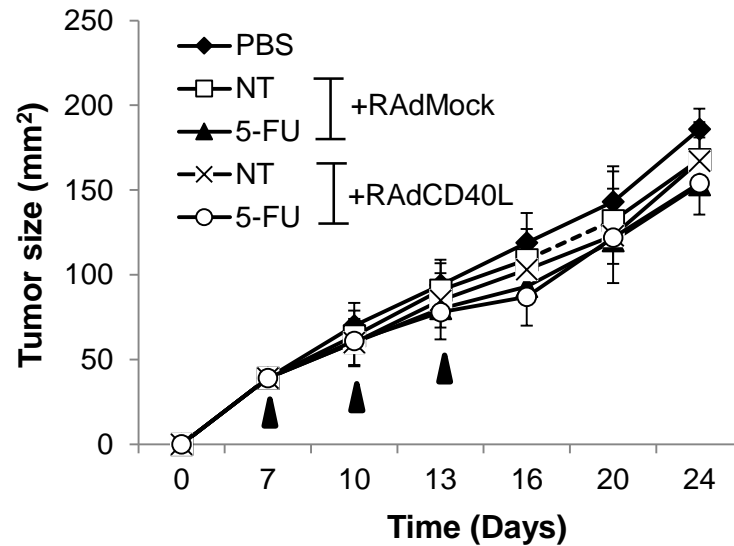

**Supplementary Figure 2:** The *in vivo* anti-tumor effects of RAd-CD40L and 5-FU combination treatment require functional Fas ligand. *gld* (non-functional FasL) mice (n=8 per group) were treated with RAd-CD40L or control virus and/or 5-FU as described in the legend of Figure 1B. Tumor size at different time points is shown. No statistically significant differences between groups were found.
